# Supplementary material
Source: publisher figshare collection journal article supplement (https://acs.figshare.com/ndownloader/files/4116631)
Supplement: Supplementary file 1 [file 4116631]

# Accommodation of a Central Arginine in a Transmembrane Peptide by Changing the Placement of Anchor Residues

*Vitaly V. Vostrikov<sup>1</sup>, Benjamin A. Hall<sup>2</sup>, Mark S. P. Sansom<sup>2</sup> and Roger E. Koeppe II<sup>1\*</sup>*

<sup>1</sup>Department of Chemistry and Biochemistry, University of Arkansas,  
Fayetteville, Arkansas 72701, USA

<sup>2</sup>Department of Biochemistry & Oxford Centre for Integrative Systems Biology,  
University of Oxford, South Parks Road, Oxford, OX1 3QU, UK

Supporting Information.

## Figures.

- S1. Analytical HPLC of GW<sup>3,21</sup>ALP23-R<sup>Z</sup>.
- S2. MALDI mass spectra of GW<sup>3,21</sup>ALP23-R<sup>Z</sup>, containing two <sup>2</sup>H-labeled alanine residues.
- S3. Difference <sup>2</sup>H NMR spectra between double and single labeled peptides used to assign overlapping peaks. Sample is GW<sup>3,21</sup>ALP23-R12 in DLPC;  $\beta=90^\circ$ .
- S4. Helical wave plots for C <sub>$\alpha$</sub> D groups of GW<sup>5,19</sup>ALP23-R14 in DOPC with different  $\epsilon_{//}$  values.
- S5. Circular dichroism spectra of GW<sup>3,21</sup>ALP23 and -Arg<sup>Z</sup> peptides in DLPC.
- S6. Deuterium NMR spectra of GW<sup>3,21</sup>ALP23-R12 in DLPC, DMPC, DOPC.
- S7. Deuterium NMR spectra of GW<sup>3,21</sup>ALP23-R14 in DLPC, DMPC, DOPC.
- S8. Deuterium NMR spectra of GW<sup>5,19</sup>ALP23-R14 in DLPC, DMPC, DOPC.
- S9. Snapshots following 50 ns of atomistic simulations in DPPC of N-terminally snorkeling Arg in GW<sup>5,19</sup>ALP23-R12 and GW<sup>3,21</sup>ALP23-R12.

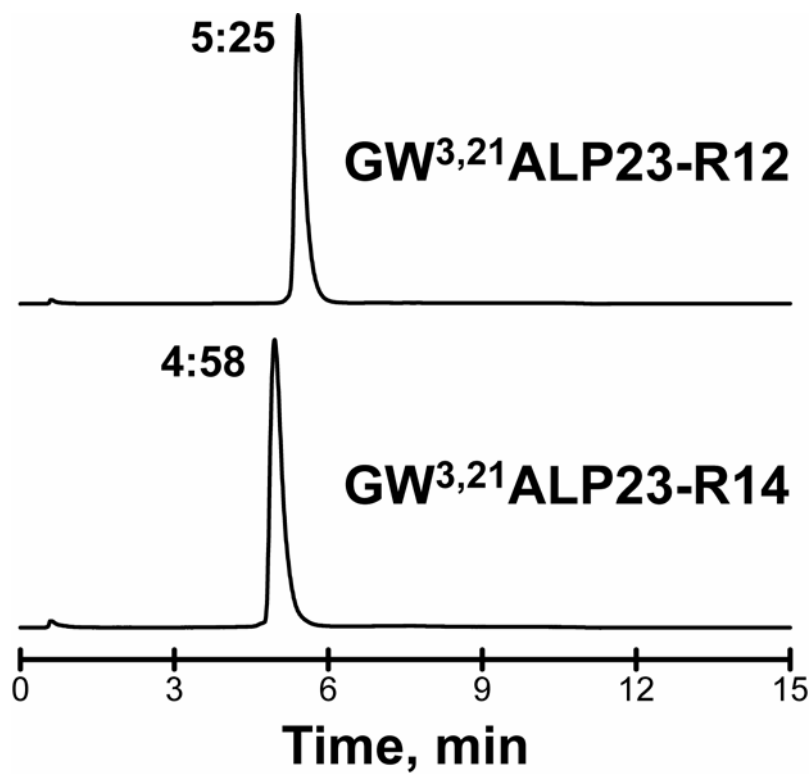

Figure S1. Analytical HPLC of GW<sup>3,21</sup>ALP23-R<sup>z</sup>.

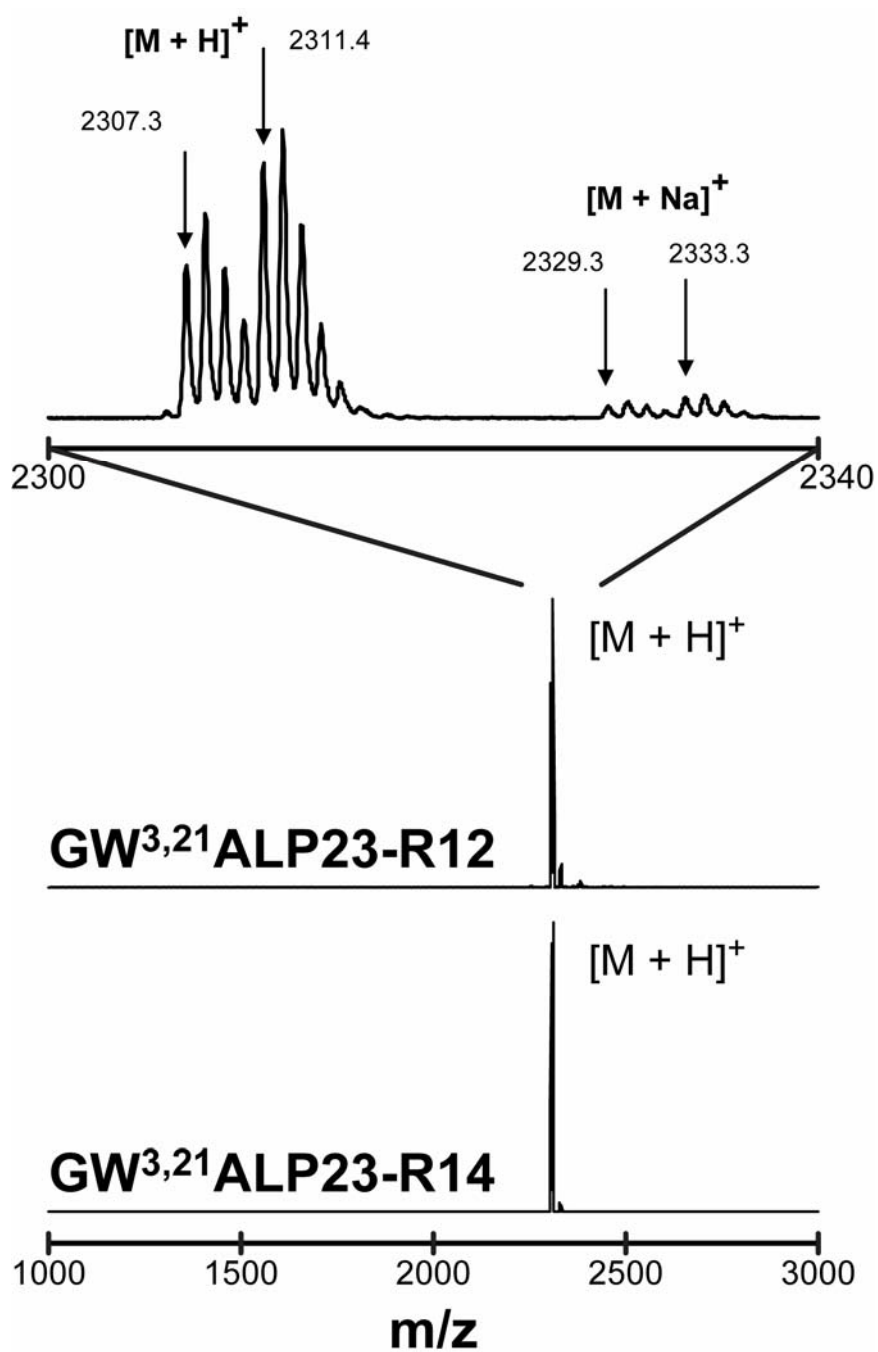

**Figure S2.** MALDI mass spectra of GW<sup>3,21</sup>ALP23-R<sup>z</sup>, containing two <sup>2</sup>H-labeled alanine residues.

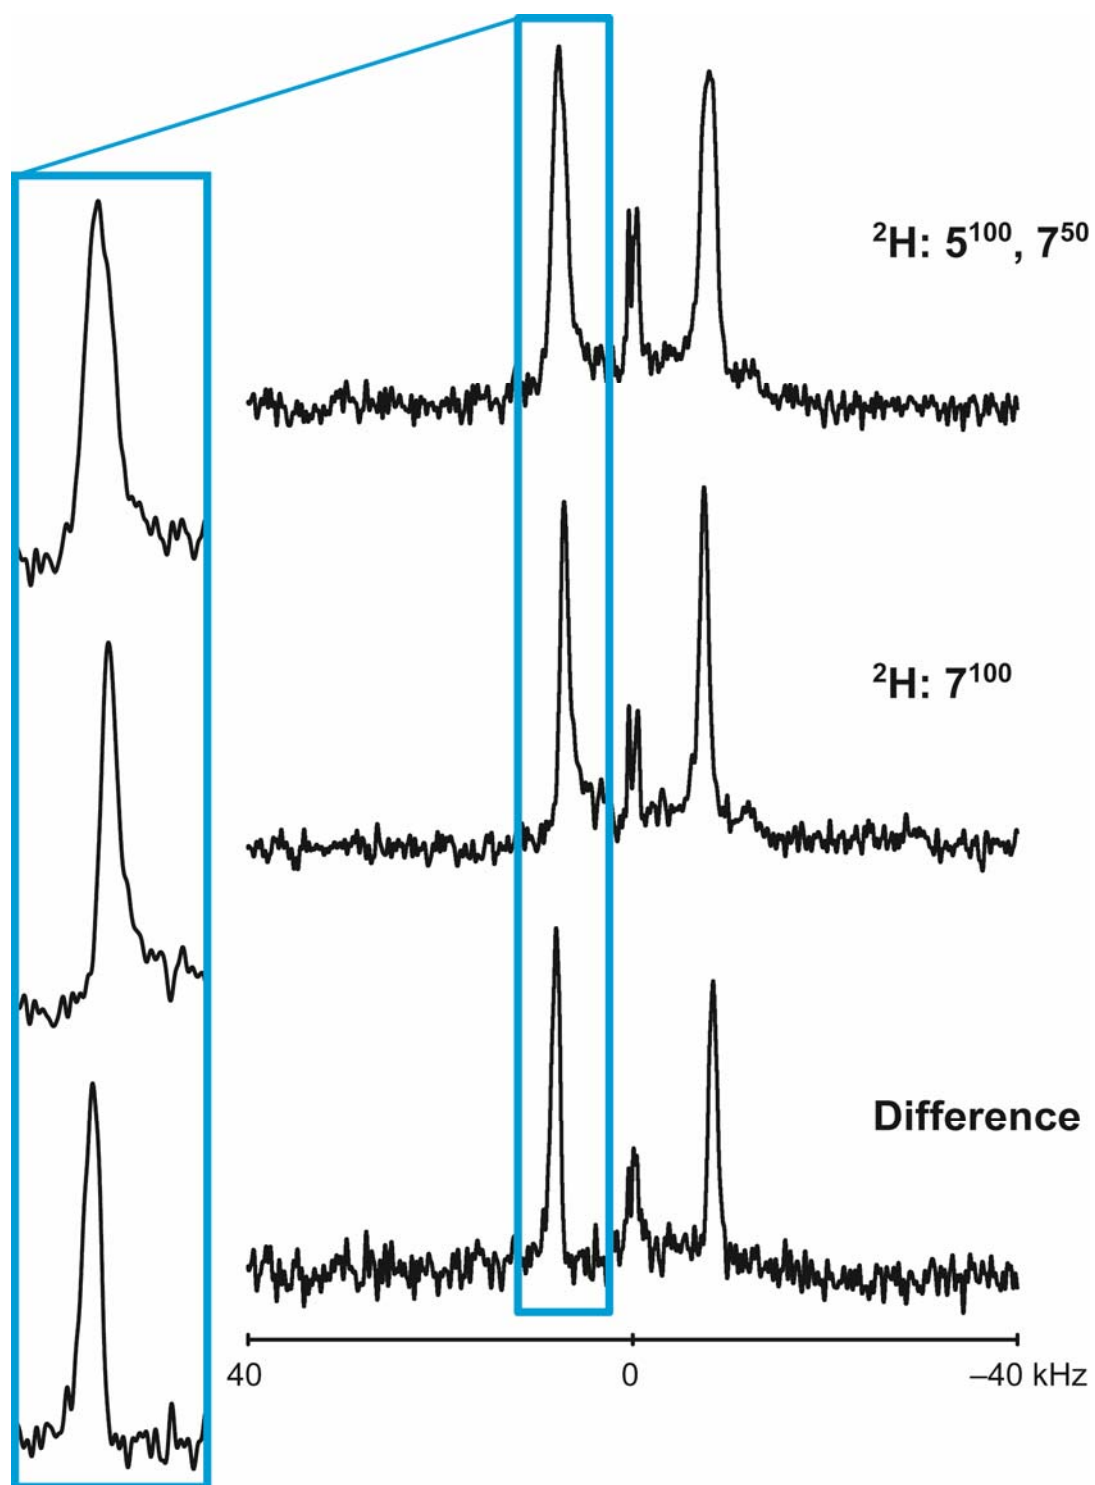

Figure S3. Difference spectra between double and single labeled peptides were used to assign the overlapping peaks. Sample is  $\text{GW}^{3,21}\text{ALP23-R12}$  in DLPC;  $\beta=90^\circ$ .

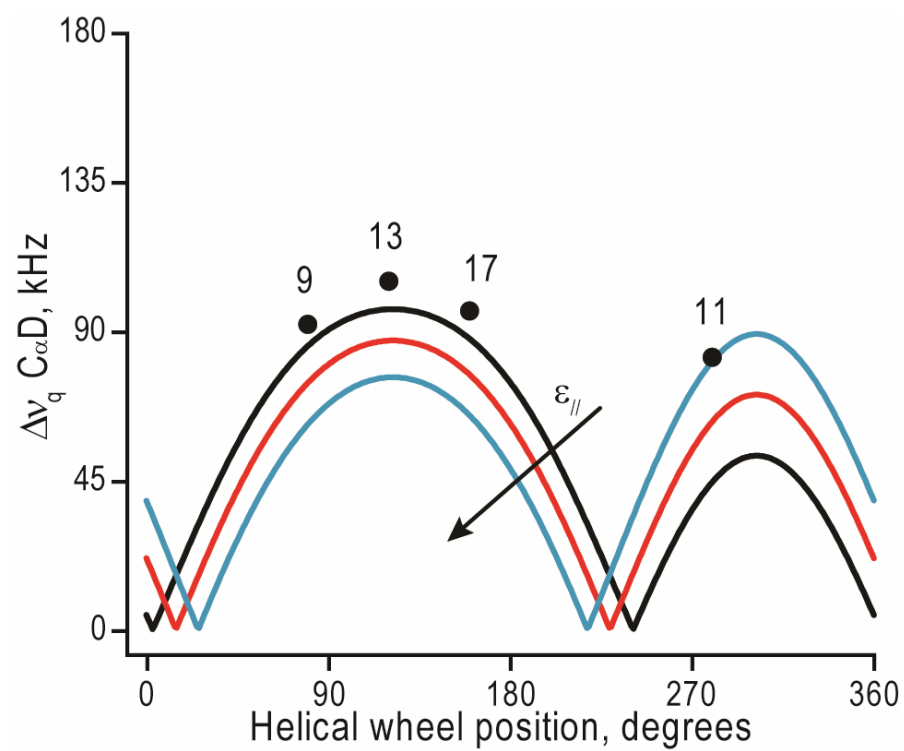

**Figure S4.** Helical wave plots for  $C_{\alpha}D$  groups of GW<sup>5,19</sup>ALP23-R14 in DOPC with different  $\epsilon_{//}$  values: 119° (black), 122° (red), 125° (blue).

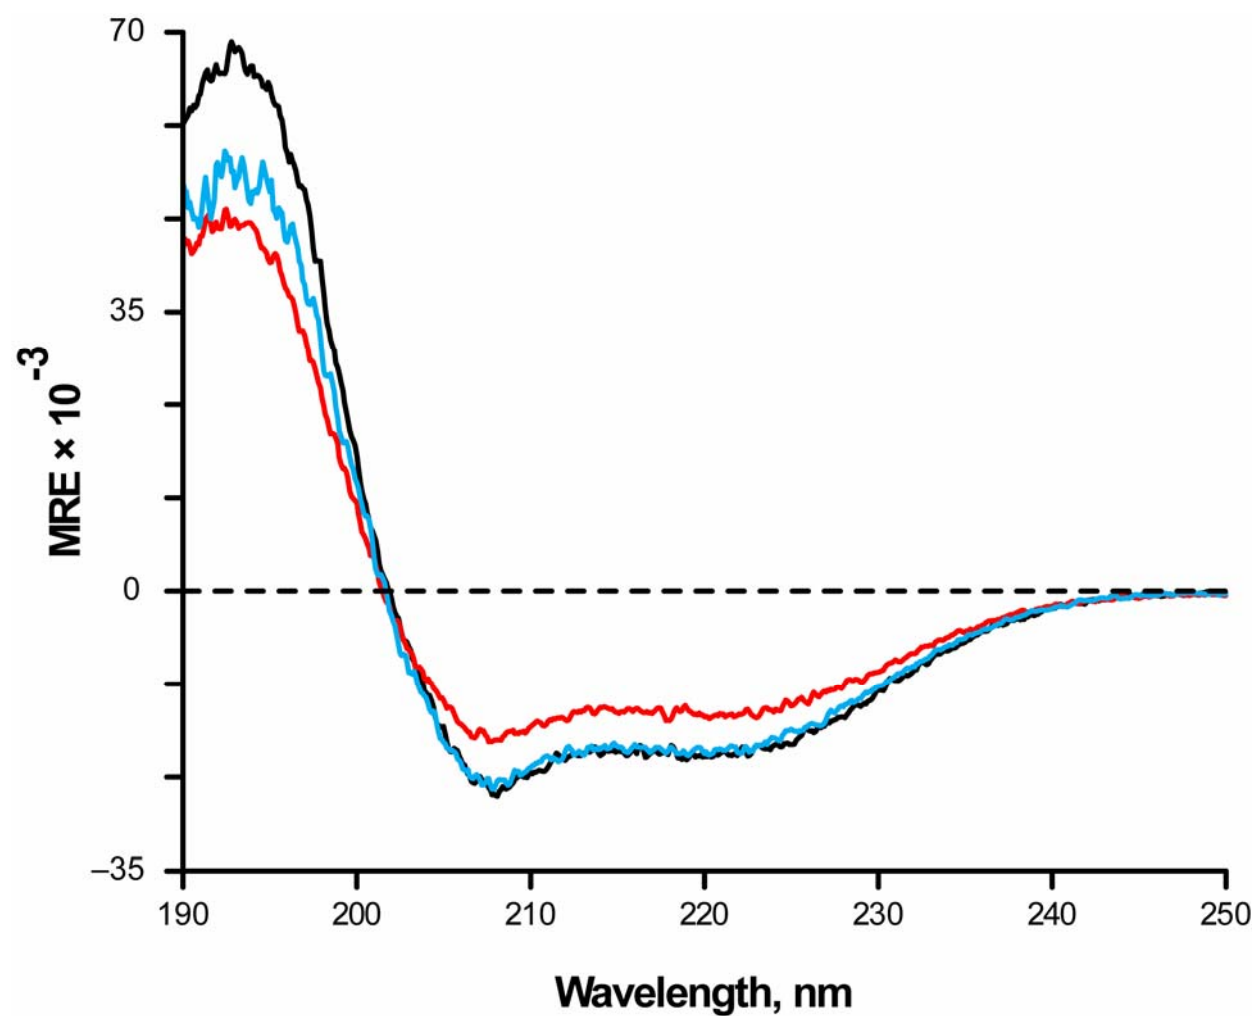

**Figure S5.** Circular dichroism spectra of GW<sup>3,21</sup>ALP23 and -Arg<sup>Z</sup> peptides in DLPC. Black: native sequence; Red: Z = 12; Blue: Z = 14.

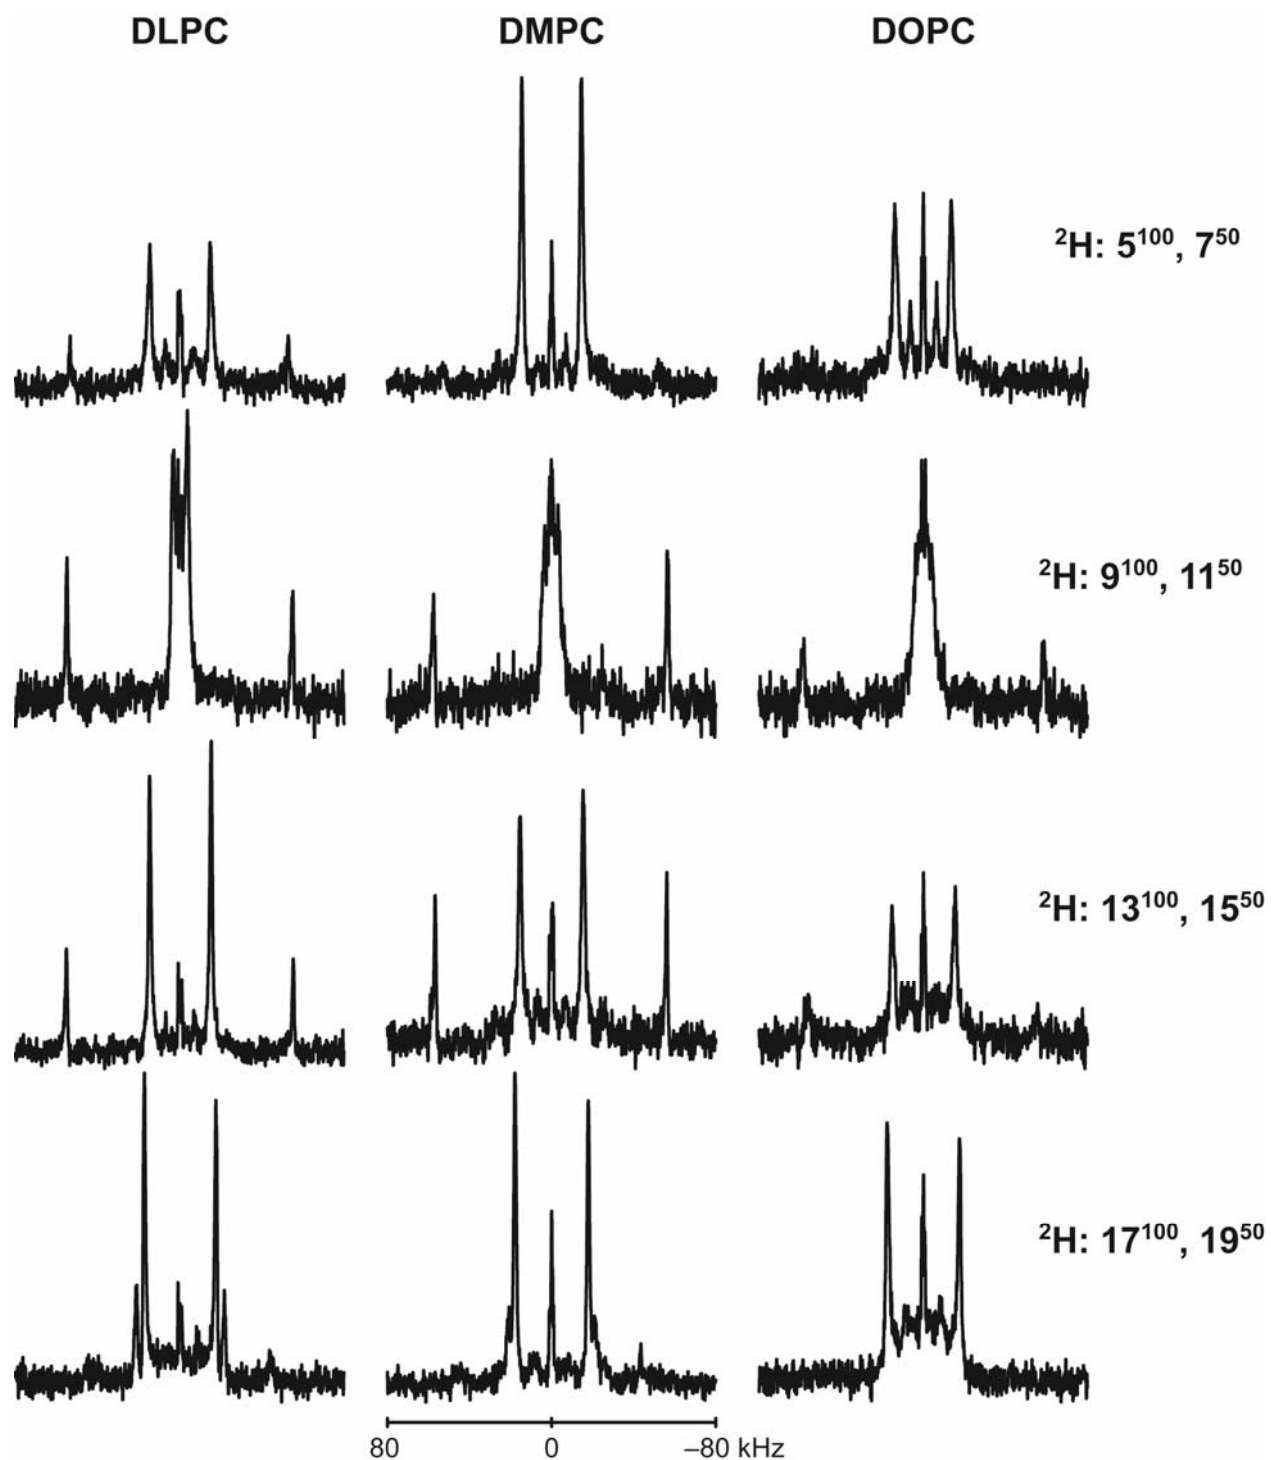

**Figure S6.** Deuterium NMR spectra of GW<sup>3,21</sup> ALP23-R12 in DLPC, DMPC, DOPC. Sample orientation is  $\beta = 0^\circ$ .

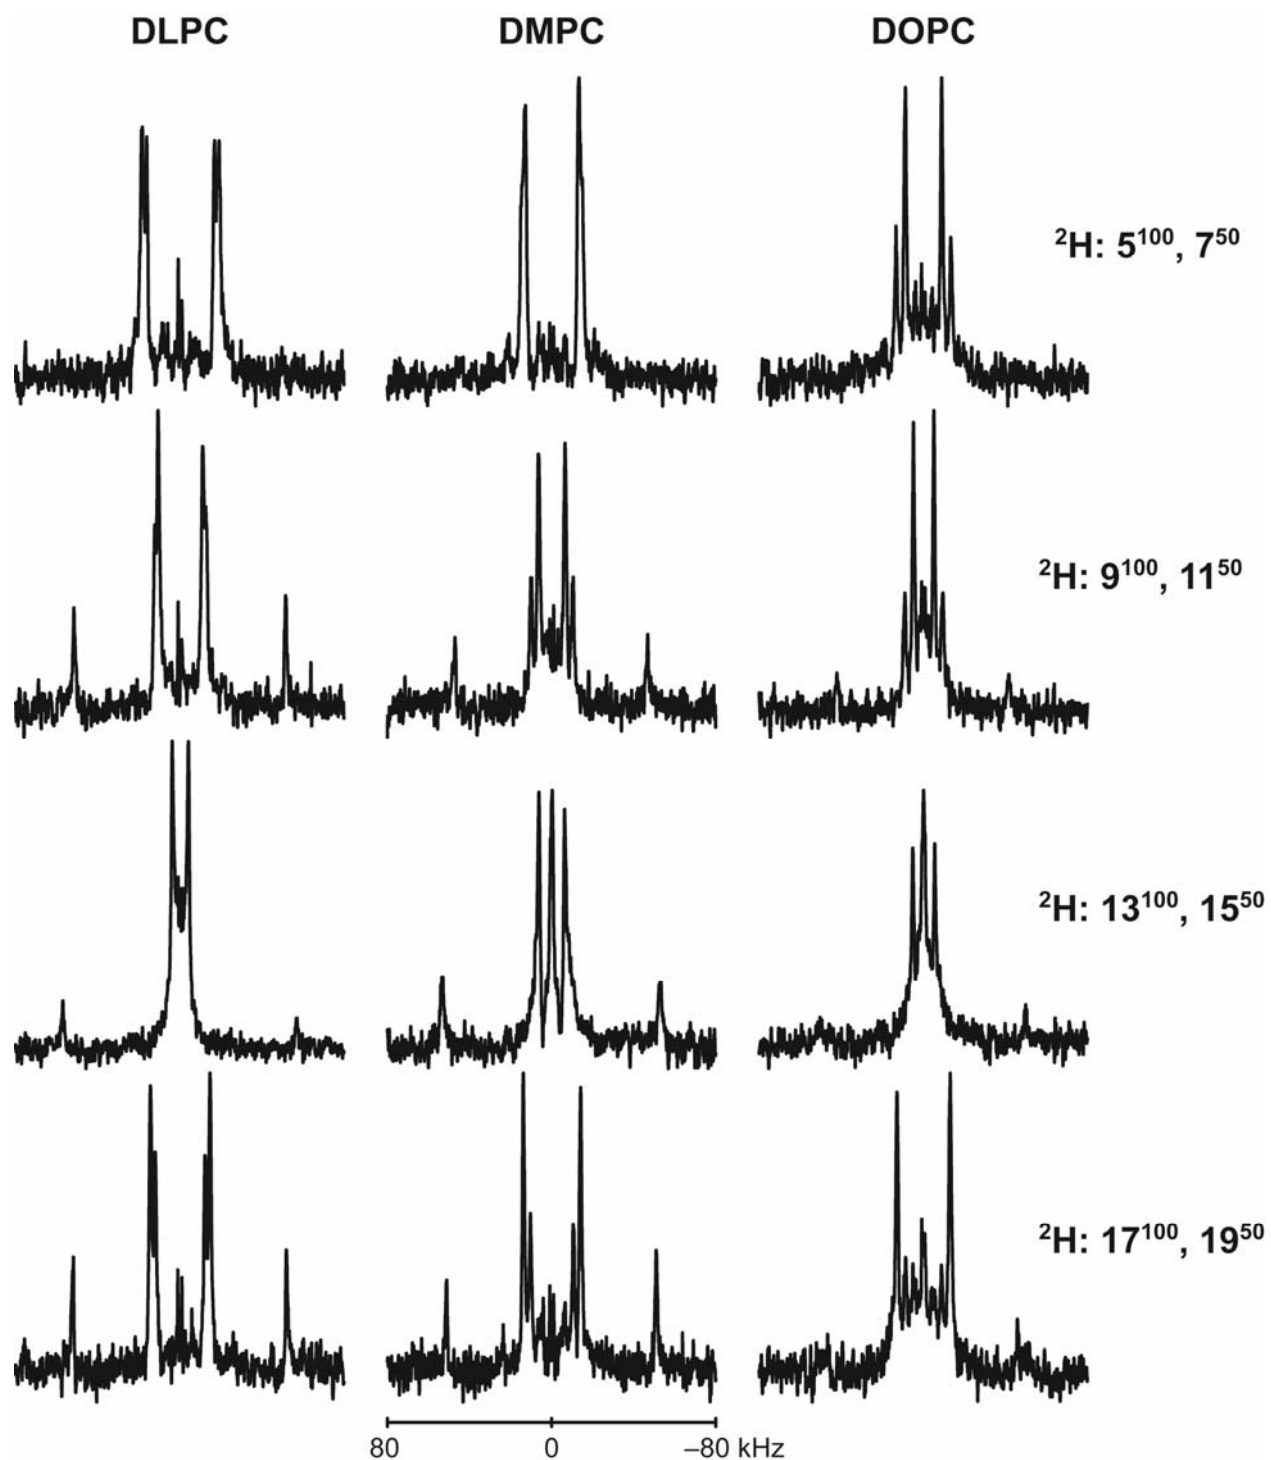

**Figure S7.** Deuterium NMR spectra of GW<sup>3,21</sup>ALP23-R14 in DLPC, DMPC, DOPC. Sample orientation is  $\beta = 0^\circ$ .



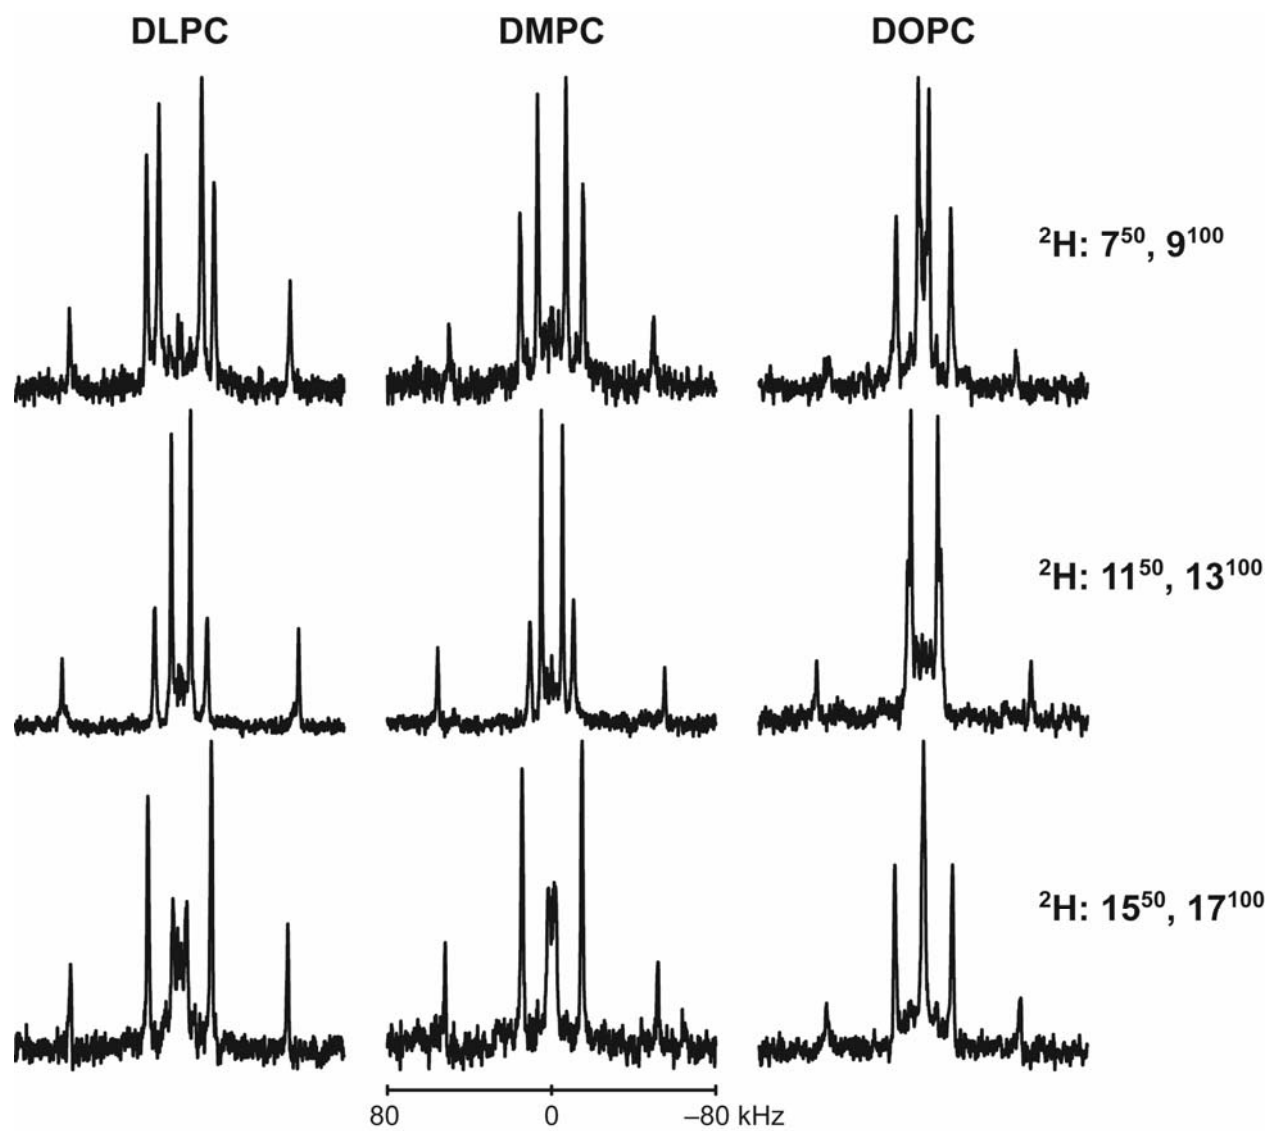

**Figure S8.** Deuterium NMR spectra of GW<sup>5,19</sup>ALP23-R14 in DLPC, DMPC, DOPC. Sample orientation is  $\beta = 0^\circ$ .

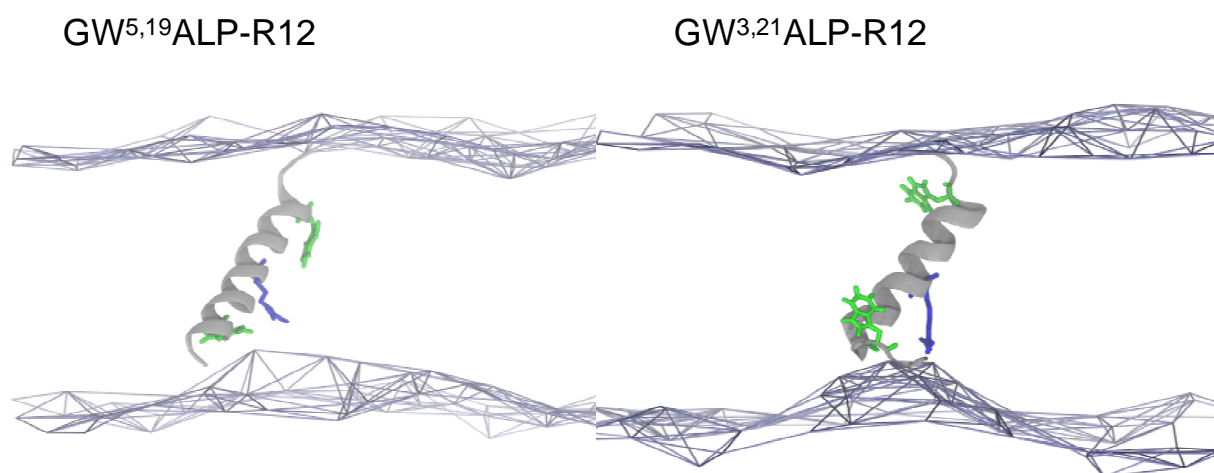

**Figure S9.** Final snapshots from 50 ns atomistic MD simulations in DPPC of N-terminally snorkeling forms of R12 modified peptides GW<sup>5,19</sup>ALP23-R12 and GW<sup>3,21</sup>ALP23-R12, with peptide backbone in grey cartoon, Trp residues green, and Arg residues blue. Bilayer phosphate head groups are rendered as a grey network.
